# Supplementary material for: Platelet-derived growth factor subunit-B mediating the effect of dickkopf-1 on acute myocardial infarction risk: a two-step Mendelian randomization study
Source: Aging (Albany NY). 2024 Jan 3;16(1):701–13. doi: 10.18632/aging.205413 (PMC10817415; doi:10.18632/aging.205413)
Supplement: Supplementary Table 1 [file aging-16-205413-s002.xls]

## Sheet: Sheet1
Supplementary Table 1. Harmonized dataset after instrumental variables selection and two-sample Mendelian randomization analysis for the effect of exposure and outcome.
exposures	outcome	SNP	effect/otherallele	Beta exposure	EAF exposure	SE exposure	P value exposure	Beta outcome	EAF outcome	SE outcome	P value outcome	R2	IV SE	F-statistic
DKK1	AMI	rs1194673	A/G	0.1824	0.63246	0.0261	2.75423e-12	0.000161857	0.638435	0.000271315	0.550798	0.0145796	0.000228927	4930.79
DKK1	AMI	rs6993770	T/A	-0.2607	0.28225	0.0272	7.76247e-22	-0.000660325	0.284839	0.000288509	0.0220943	0.0270756	0.000167989	9274.54
DKK1	AMI	rs7080386	A/C	0.1666	0.41587	0.0252	3.89045e-11	0.000418888	0.414625	0.000264688	0.11352	0.0130675	0.00024181	4412.62
DKK1	PDGF-B	rs1194673	A/G	0.1824	0.63246	0.0261	2.75423e-12	0.0076	0.6401	0.0114	0.5066	0.0145796	0.000380635	321.797
DKK1	PDGF-B	rs6993770	T/A	-0.2607	0.28225	0.0272	7.76247e-22	-0.0927	0.2626	0.0118	3.77659e-15	0.0270756	0.000279314	605.282
DKK1	PDGF-B	rs7080386	A/C	0.1666	0.41587	0.0252	3.89045e-11	0.0922	0.4132	0.0105	1.17788e-18	0.0130675	0.000402055	287.98
PDGF-B	AMI	rs10761741	T/G	0.092	0.4137	0.0104	1.03992e-18	0.000405159	0.416828	0.000264581	0.125691	0.0231573	0.000181646	7900.55
PDGF-B	AMI	rs10876550	A/G	0.0624	0.58	0.0111	1.882e-08	4.59477e-05	0.558731	0.000262075	0.860826	0.00948287	0.000283857	3190.59
PDGF-B	AMI	rs11594179	T/C	0.0699	0.2101	0.0125	2.42198e-08	-0.000331408	0.236435	0.000307153	0.280603	0.00938413	0.000285347	3157.06
PDGF-B	AMI	rs11639051	A/C	0.0722	0.2966	0.0127	1.508e-08	0.00015903	0.29302	0.000286609	0.578985	0.00969594	0.000280721	3262.98
PDGF-B	AMI	rs11770907	A/G	-0.0634	0.5263	0.0106	2.24399e-09	-0.000180329	0.554419	0.000261908	0.491126	0.0107211	0.000266962	3611.73
PDGF-B	AMI	rs4541868	A/C	-0.1033	0.247	0.0124	8.91251e-17	-0.000664951	0.272519	0.000294345	0.0238787	0.0205909	0.000192634	7006.57
PDGF-B	AMI	rs68066031	C/T	0.173	0.2316	0.015	1.38102e-30	0.000769129	0.231169	0.00031101	0.0133989	0.0387353	0.000140448	13429.4
SNP, Single nucleotide polymorphism; SE, Standard error; EAF, effect allele frequency; IV, instrumental variables; DKK1, dickkopf-1; PDGF-B, platelet derived growth factor subunit-B;
