# Supplementary material for: Platelet-derived growth factor subunit-B mediating the effect of dickkopf-1 on acute myocardial infarction risk: a two-step Mendelian randomization study
Source: Aging (Albany NY). 2024 Jan 3;16(1):701–13. doi: 10.18632/aging.205413 (PMC10817415; doi:10.18632/aging.205413)
Supplement: Supplementary Table 2 [file aging-16-205413-s003.xls]

## Sheet: Sheet1
Supplementary Table 2. Investigating the causal relationships between DKK1 and AMI or PDGF-B, and PDGF-B and AMI using the two-sample Mendelian randomization method.
exposures	outcome	method	number SNP	Beta	lower CI	upper CI	Standard error	OR	OR lower CI	OR upper CI	P value
DKK1	AMI	MR Egger	3	0.00369177	-0.00403223	0.0114158	0.00394082	1.0037	0.995976	1.01148	0.520765
DKK1	AMI	Inverse variance weighted	3	0.00208171	0.000562576	0.00360084	0.000775067	1.00208	1.00056	1.00361	0.00723474
DKK1	AMI	Maximum likelihood	3	0.00209196	0.000538867	0.00364506	0.000792397	1.00209	1.00054	1.00365	0.00828945
DKK1	AMI	Simple median	3	0.00251433	0.000473225	0.00455544	0.00104138	1.00252	1.00047	1.00457	0.0157603
DKK1	AMI	Weighted median	3	0.00251957	0.000785001	0.00425414	0.000884985	1.00252	1.00079	1.00426	0.00441304
DKK1	AMI	Penalised weighted median	3	0.00251957	0.000754177	0.00428497	0.000900711	1.00252	1.00075	1.00429	0.00515296
DKK1	AMI	Simple mode	3	0.00252346	0.000284212	0.0047627	0.00114247	1.00253	1.00028	1.00477	0.157833
DKK1	AMI	Weighted mode	3	0.00252691	0.000449157	0.00460466	0.00106008	1.00253	1.00045	1.00462	0.13997
DKK1	PDGF-B	MR Egger	3	0.297953	-1.53602	2.13192	0.9357	1.3471	0.215236	8.43108	0.803745
DKK1	PDGF-B	Inverse variance weighted	3	0.324899	0.0682773	0.58152	0.130929	1.38389	1.07066	1.78875	0.0130837
DKK1	PDGF-B	Maximum likelihood	3	0.363494	0.277859	0.44913	0.0436917	1.43835	1.3203	1.56695	8.83066e-17
DKK1	PDGF-B	Simple median	3	0.355581	0.237237	0.473925	0.0603797	1.42701	1.26774	1.60629	3.88338e-09
DKK1	PDGF-B	Weighted median	3	0.26203	0.153507	0.370552	0.0553687	1.29957	1.16592	1.44853	2.21829e-06
DKK1	PDGF-B	Penalised weighted median	3	0.360563	0.242471	0.478654	0.0602507	1.43414	1.27439	1.6139	2.17229e-09
DKK1	PDGF-B	Simple mode	3	0.410811	0.234764	0.586857	0.0898198	1.50804	1.26461	1.79833	0.0446278
DKK1	PDGF-B	Weighted mode	3	0.295949	0.0977239	0.494174	0.101135	1.3444	1.10266	1.63914	0.0996329
PDGF-B	AMI	MR Egger	7	0.0074971	0.0013751	0.0136191	0.00312347	1.00753	1.00138	1.01371	0.0616019
PDGF-B	AMI	Inverse variance weighted	7	0.00357583	0.00136228	0.00578939	0.00112936	1.00358	1.00136	1.00581	0.00154426
PDGF-B	AMI	Maximum likelihood	7	0.00361806	0.00136576	0.00587035	0.00114913	1.00362	1.00137	1.00589	0.001641
PDGF-B	AMI	Simple median	7	0.00284431	-0.000624332	0.00631294	0.00176971	1.00285	0.999376	1.00633	0.108008
PDGF-B	AMI	Weighted median	7	0.0044225	0.00149874	0.00734627	0.00149172	1.00443	1.0015	1.00737	0.00302973
PDGF-B	AMI	Penalised weighted median	7	0.00442345	0.00162282	0.00722409	0.0014289	1.00443	1.00162	1.00725	0.0019634
PDGF-B	AMI	Simple mode	7	0.0034722	-0.000560417	0.00750482	0.00205746	1.00348	0.99944	1.00753	0.142454
PDGF-B	AMI	Weighted mode	7	0.00440527	0.00131767	0.00749286	0.0015753	1.00441	1.00132	1.00752	0.0313098
DKK1, dickkopf-1; PDGF-B, platelet derived growth factor subunit-B; AMI, acute myocardial infarction; OR, odds ratio; SNP, single nucleotide polymorphism
