# Supplementary material for: Platelet-derived growth factor subunit-B mediating the effect of dickkopf-1 on acute myocardial infarction risk: a two-step Mendelian randomization study
Source: Aging (Albany NY). 2024 Jan 3;16(1):701–13. doi: 10.18632/aging.205413 (PMC10817415; doi:10.18632/aging.205413)
Supplement: Supplementary Table 5 [file aging-16-205413-s005.xls]

## Sheet: Sheet1
Supplementary Table 5. Investigating the causal relationships between AMI and DKK1 or PDGF-B, and PDGF-B and DKK1 using the two-sample Mendelian randomization method.
exposures	outcome	method	number SNP	Beta	lower CI	upper CI	Standard error	OR	OR lower CI	OR upper CI	P value
AMI	DKK1	MR Egger	3	-2.96086	-49.3626	43.4409	23.6743	0.0517743	3.64839e-22	7.34728e+18	0.920792
AMI	DKK1	Inverse variance weighted	3	1.80817	-14.1028	17.7192	8.11786	6.09926	7.50262e-07	4.95841e+07	0.823738
AMI	DKK1	Maximum likelihood	3	1.8228	-14.1522	17.7978	8.15053	6.18915	7.14102e-07	5.36416e+07	0.823036
AMI	DKK1	Simple median	3	8.96263	-12.8553	30.7806	11.1316	7805.88	2.61219e-06	2.3326e+13	0.420732
AMI	DKK1	Weighted median	3	3.52032	-13.393	20.4337	8.62927	33.7953	1.52572e-06	7.48583e+08	0.683309
AMI	DKK1	Penalised weighted median	3	3.52032	-14.4135	21.4541	9.1499	33.7953	5.49923e-07	2.07688e+09	0.700431
AMI	DKK1	Simple mode	3	10.3031	-14.9109	35.5172	12.8643	29825.8	3.34408e-07	2.66015e+15	0.507211
AMI	DKK1	Weighted mode	3	-6.26352	-25.8838	13.3568	10.0104	0.00190453	5.73838e-12	632101	0.595394
AMI	PDGF-B	MR Egger	3	-9.93755	-56.4867	36.6116	23.7496	4.83254e-05	2.9385e-25	7.94739e+15	0.747712
AMI	PDGF-B	Inverse variance weighted	3	-1.62807	-14.1882	10.9321	6.40824	0.196308	6.88869e-07	55942.3	0.79945
AMI	PDGF-B	Maximum likelihood	3	-1.70405	-9.0587	5.6506	3.75237	0.181945	0.000116374	284.463	0.649738
AMI	PDGF-B	Simple median	3	5.91259	-5.1061	16.9313	5.62178	369.661	0.00605965	2.25507e+07	0.292924
AMI	PDGF-B	Weighted median	3	1.66545	-7.04406	10.375	4.44363	5.28804	0.000872577	32046.9	0.707813
AMI	PDGF-B	Penalised weighted median	3	6.18216	-4.8722	17.2365	5.63998	484.036	0.00765648	3.06003e+07	0.273021
AMI	PDGF-B	Simple mode	3	6.63572	-6.75555	20.027	6.83228	761.824	0.0011644	4.98435e+08	0.433884
AMI	PDGF-B	Weighted mode	3	6.58056	-12.5147	25.6758	9.74246	720.944	3.67245e-06	1.41529e+11	0.569018
PDGF-B	DKK1	MR Egger	7	-0.58501	-2.95964	1.78962	1.21154	0.5571	0.0518377	5.98716	0.649592
PDGF-B	DKK1	Inverse variance weighted	7	0.703258	-0.167506	1.57402	0.444267	2.02032	0.845771	4.82602	0.11343
PDGF-B	DKK1	Maximum likelihood	7	0.912524	0.64194	1.18311	0.138053	2.4906	1.90016	3.2645	3.84e-11
PDGF-B	DKK1	Simple median	7	1.32808	0.706254	1.9499	0.317256	3.77377	2.02639	7.02796	2.84e-05
PDGF-B	DKK1	Weighted median	7	0.0569332	-0.432536	0.546403	0.249729	1.05859	0.648861	1.72703	0.819662
PDGF-B	DKK1	Penalised weighted median	7	0.0606989	-0.461478	0.582876	0.266417	1.06258	0.630351	1.79118	0.819775
PDGF-B	DKK1	Simple mode	7	1.63418	0.604095	2.66427	0.525555	5.12527	1.8296	14.3575	0.0208636
PDGF-B	DKK1	Weighted mode	7	-0.265997	-0.612233	0.0802396	0.176651	0.766442	0.542139	1.08355	0.182836
DKK1, dickkopf-1; PDGF-B, platelet derived growth factor subunit-B; AMI, acute myocardial infarction; OR, odds ratio; SNP, single nucleotide polymorphism
